# Supplementary material for: RNA quality in frozen breast cancer samples and the influence on gene expression analysis – a comparison of three evaluation methods using microcapillary electrophoresis traces
Source: PubMed Central journal article supplement (PMC1891312; doi:10.1186/1471-2199-8-38), 2007-05-22
Supplement: 1471-2199-8-38-S1.pdf [file 1471-2199-8-38-S1.pdf]

50 sec

2-3 min

10 min

30 min

a, Sample 1, 18269 good

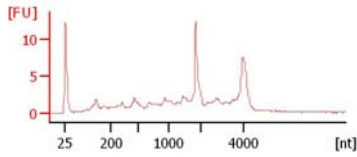

Ratio 1.04  
RIN 7  
Corr. 1.00

good

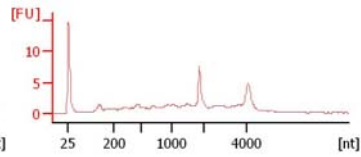

Ratio 1.01  
RIN 7  
Corr. 0.75

degr

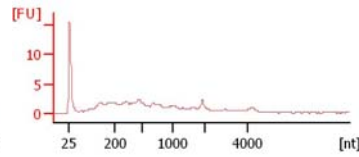

Ratio 0.54  
RIN 4  
Corr. -0.03

degr

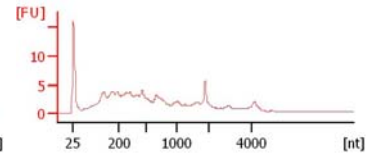

Ratio 0.44  
RIN 5  
Corr. 0.04

b, Sample 2, 18245 good

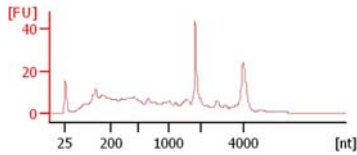

Ratio 1.04  
RIN 6  
Corr. 1.00

good

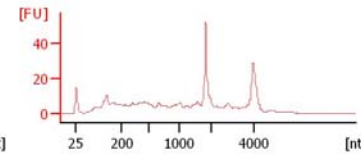

Ratio 1.06  
RIN 7  
Corr. 0.87

good

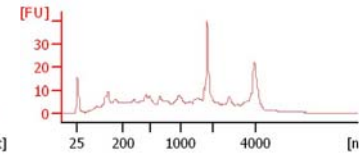

Ratio 1.56  
RIN 6  
Corr. 0.81

degr

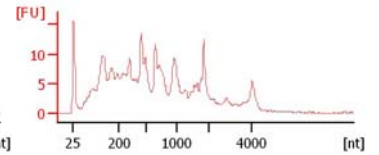

Ratio 0.60  
RIN 4  
Corr. 0.22

c, Sample 3, 18230 good

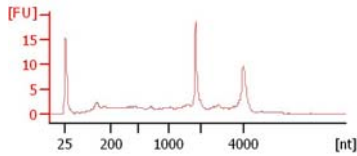

Ratio 0.98  
RIN 7  
Corr. 1.00

degr

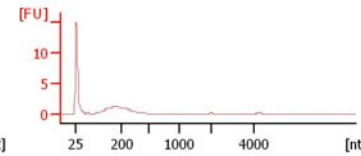

Ratio n/a  
RIN 1  
Corr. -0.26

degr

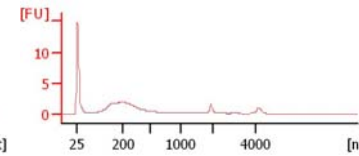

Ratio 0.82  
RIN 5  
Corr. -0.13

partly

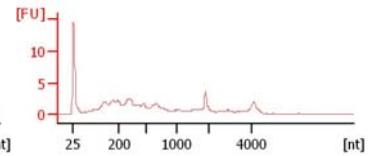

Ratio 0.83  
RIN 6  
Corr. 0.26

d, Sample 4, 18193 good

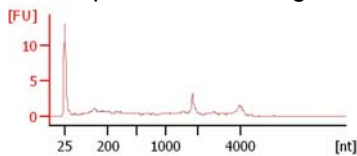

Ratio 0.49  
RIN 7  
Corr. 1.00

good

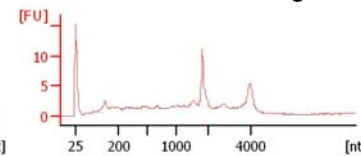

Ratio 0.72  
RIN 7  
Corr. 0.75

degr

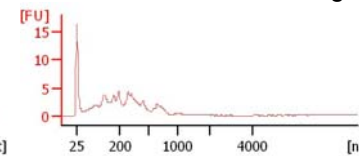

Ratio n/a  
RIN 2  
Corr. -0.15

degr

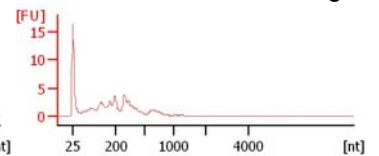

Ratio n/a  
RIN 2  
Corr. -0.21

e, Sample 5, 18165 good

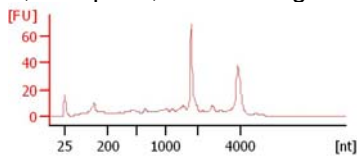

Ratio 1.03  
RIN 7  
Corr. 1.00

good

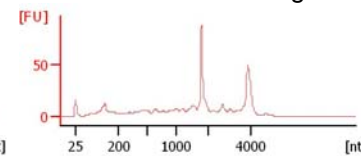

Ratio 0.93  
RIN 7  
Corr. 0.92

partly

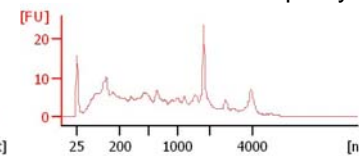

Ratio 0.60  
RIN 5  
Corr. 0.75

degr

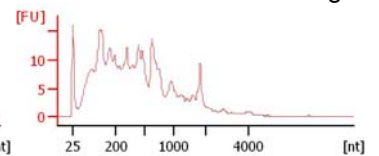

Ratio n/a  
RIN 3  
Corr. -0.01

f, Sample 6, 18146 partly

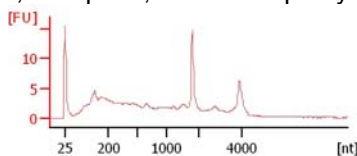

Ratio 0.71  
RIN 6  
Corr. 1.00

partly

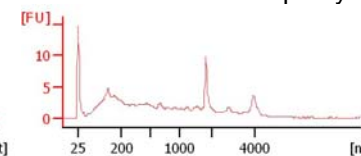

Ratio 0.60  
RIN 6  
Corr. 0.70

partly

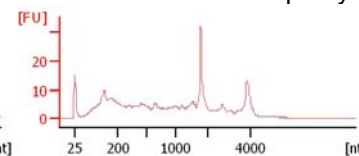

Ratio 0.85  
RIN 6  
Corr. 0.59

partly

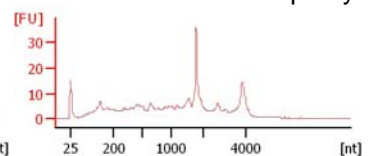

Ratio 0.86  
RIN 6  
Corr. 0.59
